# Supplementary material for: Ablation of astrocytic laminin impairs vascular smooth muscle cell function and leads to hemorrhagic stroke
Source: PubMed Central journal article supplement — J Cell Biol. 2013 Jul 22;202(2):381–95. doi: 10.1083/jcb.201212032 (PMC3718965; doi:10.1083/jcb.201212032), 2013-07-22
Supplement: supp_jcb.201212032_JCB_201212032_sm.pdf [file supp_jcb.201212032_JCB_201212032_sm.pdf]

Chen et al., <http://www.jcb.org/cgi/content/full/jcb.201212032/DC1>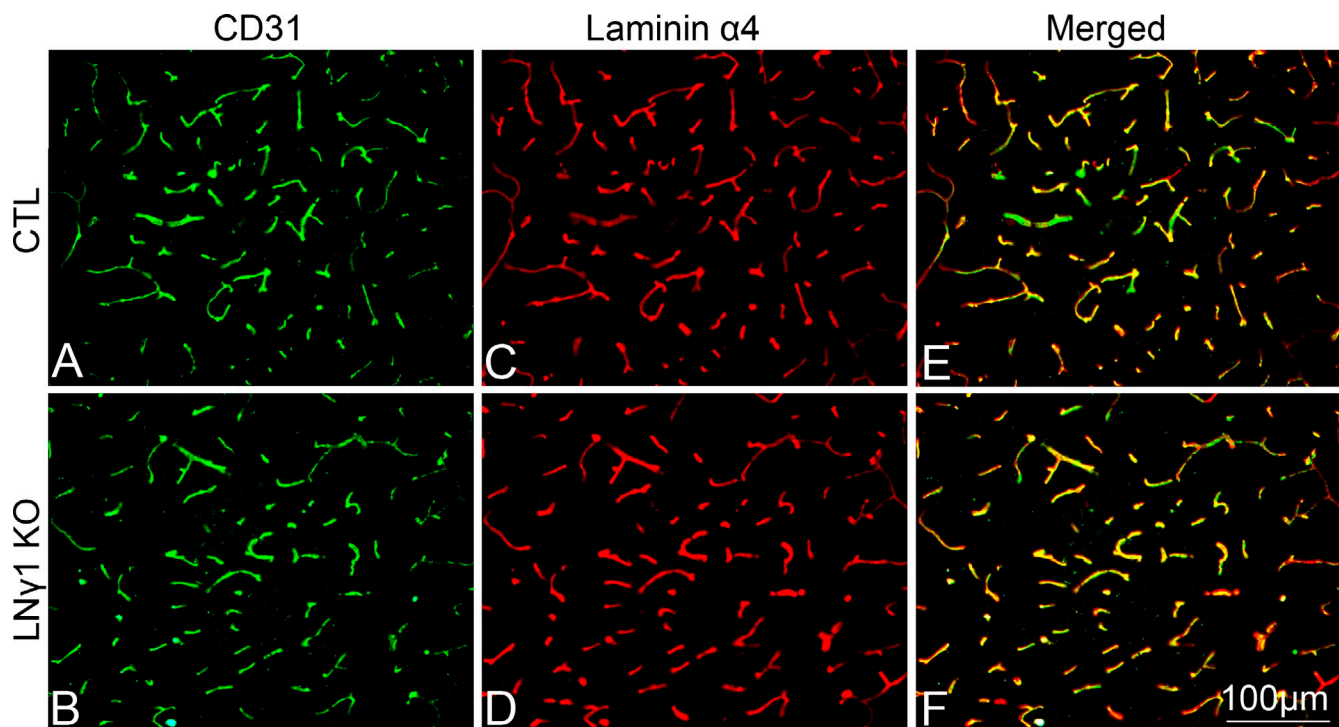

Figure S1. **All endothelial cells express laminin  $\alpha$ 4 in both control and LNY1-KO mice.** Brain sections from control and LNY1-KO mice were stained for CD31 (A and B) and laminin  $\alpha$ 4 (C and D), and the images were merged (E and F). All CD31 staining colocalized with laminin  $\alpha$ 4 staining, indicating all endothelial cells express laminin  $\alpha$ 4 in both control and LNY1-KO mice. Bar, 100  $\mu$ m.

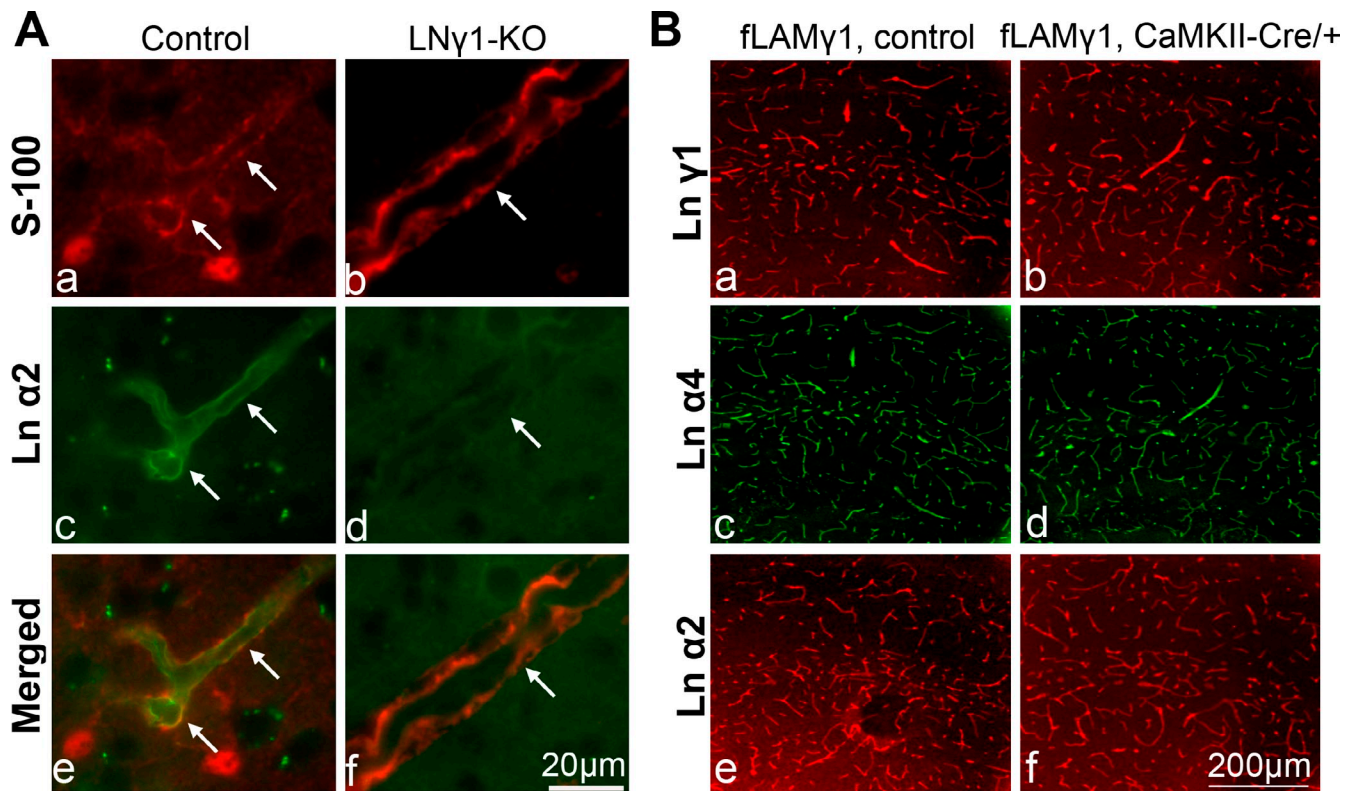

Figure S2. **Disruption of laminin  $\alpha$ 2 expression at the astrocytic endfeet of LN $\gamma$ 1-KO mice and neuronal laminin does not contribute to the vascular matrix.** (A) Brain sections from control and LN $\gamma$ 1-KO mice were stained for S-100 to identify astrocytic endfeet (Aa and Ab, arrows) or laminin  $\alpha$ 2 (Ac and Ad, arrows), and the images were merged (Ae and Af). Astrocytic endfeet expressed laminin  $\alpha$ 2 in control mice (Ae), but endfeet of LN $\gamma$ 1-KO mice did not (Af). Bar, 20  $\mu$ m. (B) Brain sections from control mice and mice deficient in laminin by the CaMKII-Cre promoter were stained for laminin  $\gamma$ 1 (Ba and Bb), laminin  $\alpha$ 4 (Bc and Bd), and laminin  $\alpha$ 2 (Be and Bf). All laminin chains were expressed similarly between control and knockout mice. Therefore, disruption of laminin  $\alpha$ 1 and  $\alpha$ 2 expression in LN $\gamma$ 1-KO mice is due to ablation of laminin  $\gamma$ 1 in astrocytes, and not due to lack of laminin  $\gamma$ 1 in neurons or endothelial cells. Bar, 200  $\mu$ m.

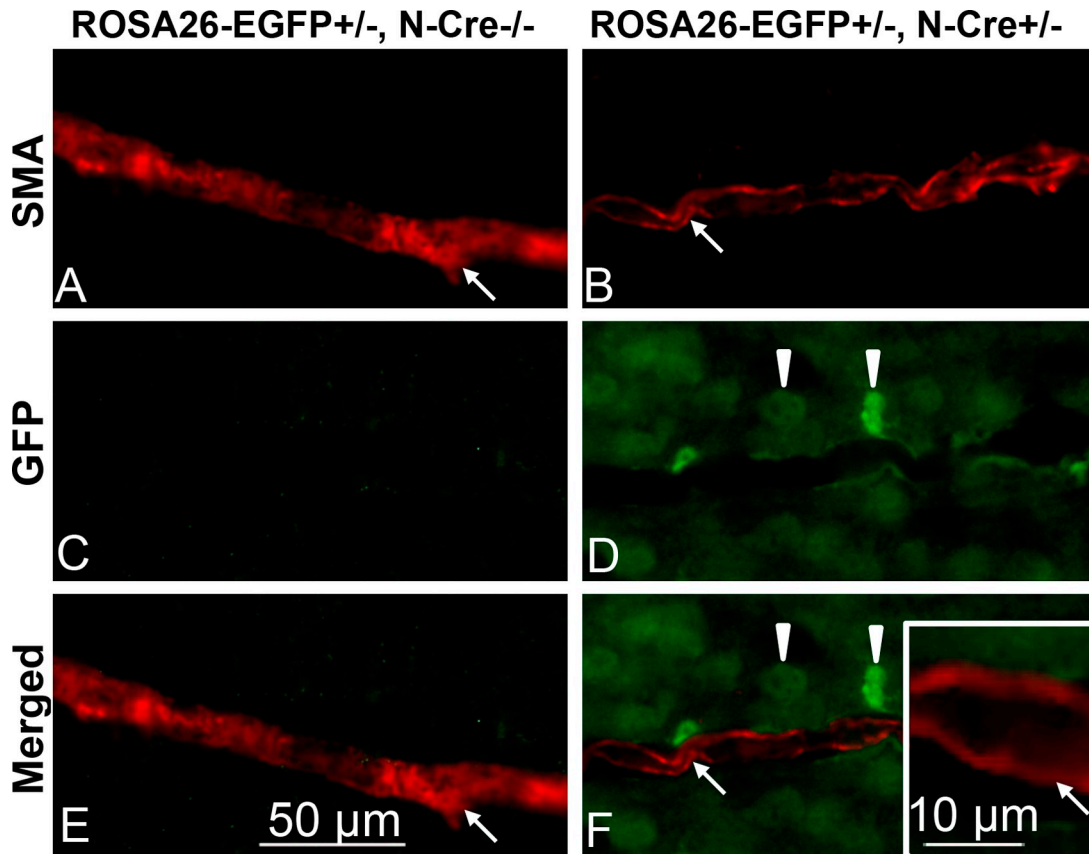

Figure S3. **Cre expression patterns in nestin-Cre mouse line.** Brain sections were stained for SMA (A and B) and EGFP (C and D), and the images were merged (E and F). EGFP was not expressed in brain tissues of ROSA26-EGFP<sup>+/-</sup>; nestin-Cre<sup>-/-</sup> mice (C). It was expressed in the brain parenchyma cells (astrocytes and neurons, and arrowheads in D and F) but not VSMCs (arrows in F) of ROSA26-EGFP<sup>+/-</sup>; nestin-Cre<sup>+/-</sup> mice, indicating Cre is active in astrocytes and neurons, but not VSMCs in the nestin-Cre mouse line. Inset in F shows higher magnification of the images. Bar, 50 µm

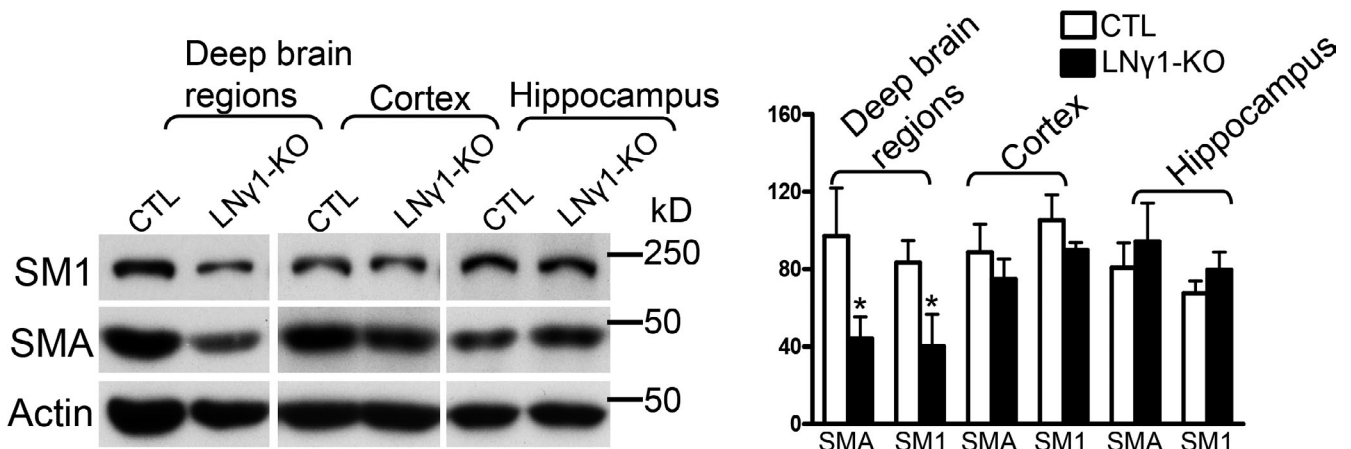

Figure S4. **Region-specific VSMC contractile protein expression changes in LN $\gamma$ 1-KO mice during development.** Western blot analysis showed that at post-natal day 28 expression levels of SMA and SM1 were significantly decreased in deep cerebral regions of LN $\gamma$ 1-KO mice compared with controls. SMA and SM1 expression in cerebral cortex and hippocampus of LN $\gamma$ 1-KO mice were not significantly changed compared with the same regions of the control mice.

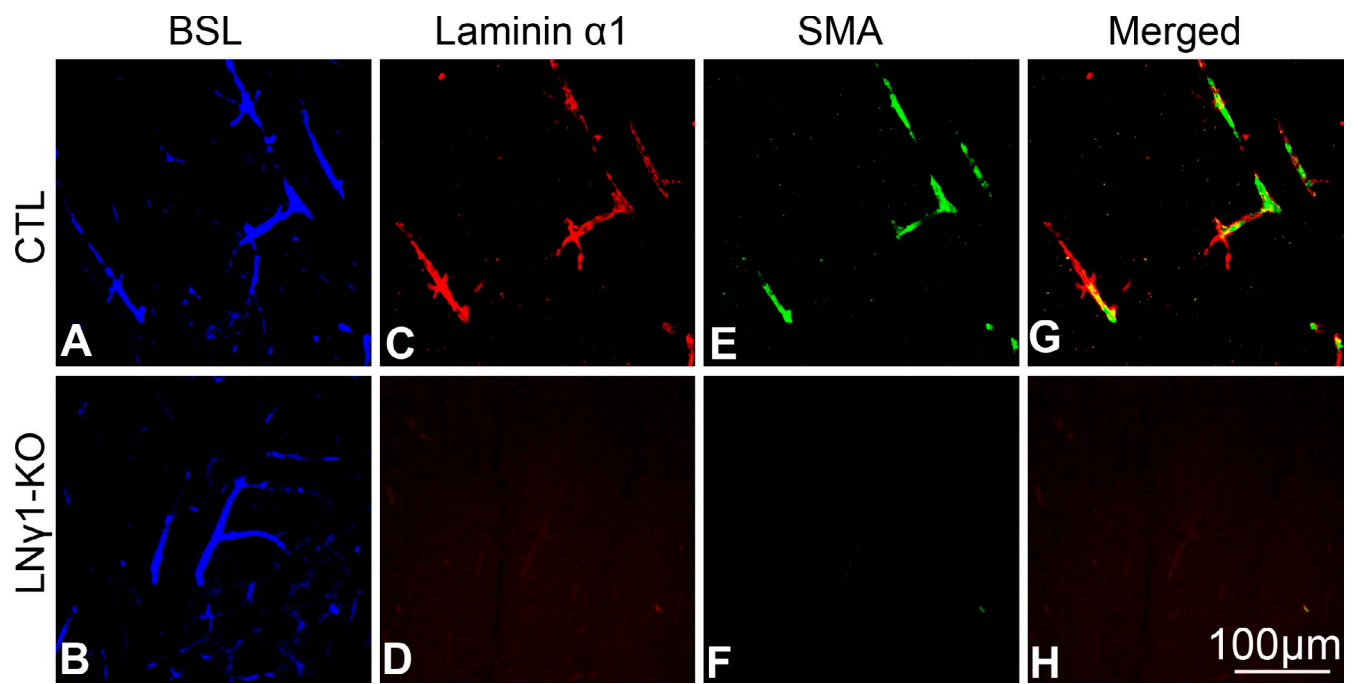

Figure S5. **Relationship between astrocytic laminin  $\alpha$ 1 and SMA expression.** Brain sections from control and LNY1-KO mice were stained for BSL to identify large caliber blood vessels (A and B), laminin  $\alpha$ 1 (C and D), or SMA (E and F). Images of laminin  $\alpha$ 1 and SMA were merged (G and H). In control mice, laminin  $\alpha$ 1 expression was mostly associated with large blood vessels (A vs. C) and colocalized with SMA expression (C, E, and G). However, expression levels of laminin  $\alpha$ 1 (D) and SMA (F) in LNY1-KO mouse brain were both dramatically decreased (D, F, and H). Bar, 100  $\mu$ m.
